# Supplementary figures and images for: Brainstem and Cortical Spreading Depolarization in a Closed Head Injury Rat Model
Source: MDPI journal article supplement (doi:10.3390/ijms222111642), 2021-10-28

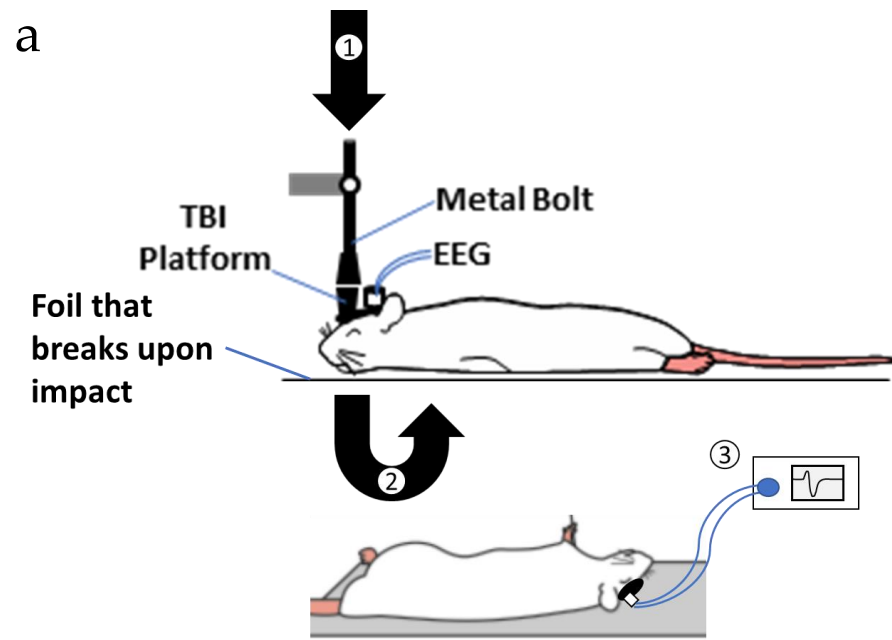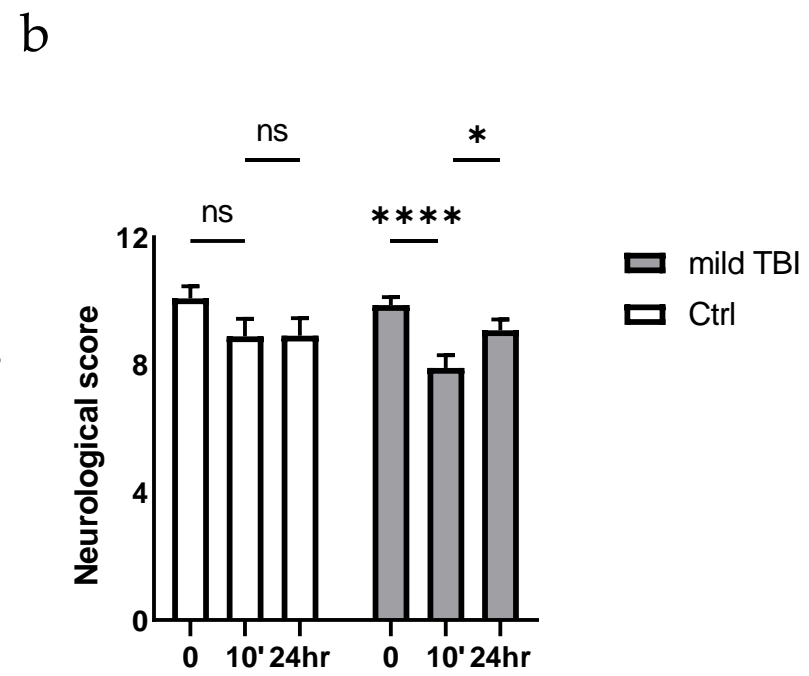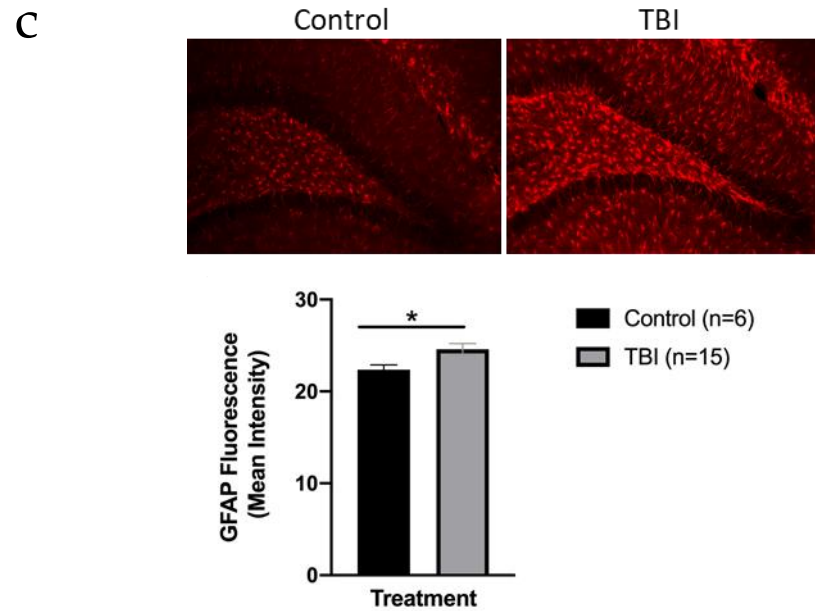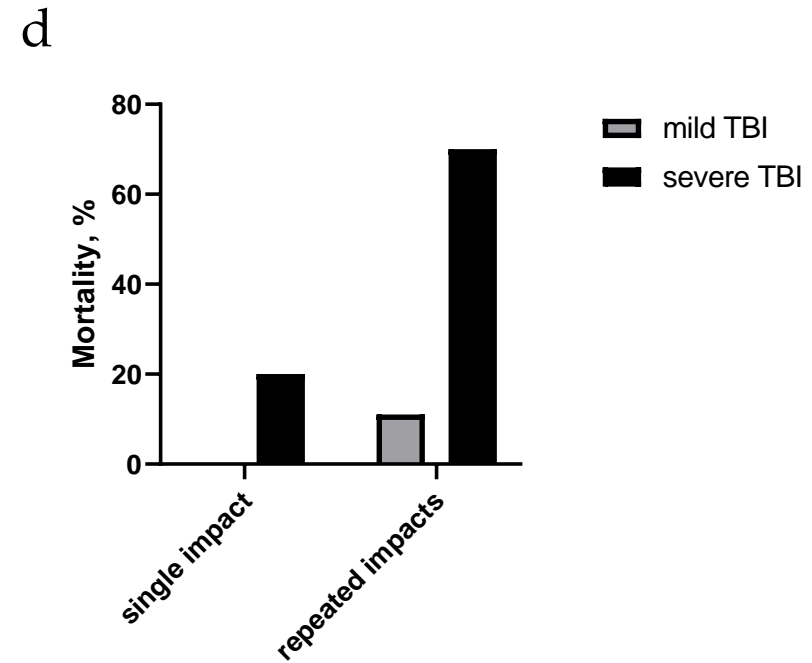

Supplement: s1 [file s1]

Antioxidants from brain homogenate

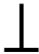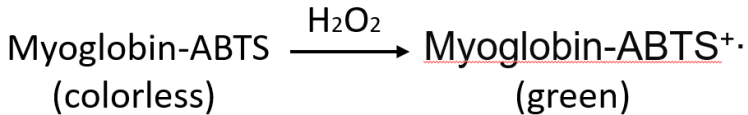

Supplement: s1 [file s1]
